# Supplementary material for: Selenium heteroatom-doped mesoporous carbon as an efficient air-breathing electrode for rechargeable lithium–oxygen batteries
Source: Royal Society of Chemistry journal article supplement (doi:10.1039/d2nj05679h), 2022-12-21
Supplement: d2nj05679h1.pdf [file d2nj05679h1.pdf]

## Selenium Heteroatom-doped Mesoporous Carbon as Efficient Air-breathing Electrode for Rechargeable Lithium-Oxygen Battery

Vaithiyanathan Sankar Devi and Perumal Elumalai\*

Electrochemical Energy Storage Lab, Department of Green Energy Technology,  
Madanjeet School of Green Energy Technologies, Pondicherry University,  
Puducherry-605014, India.

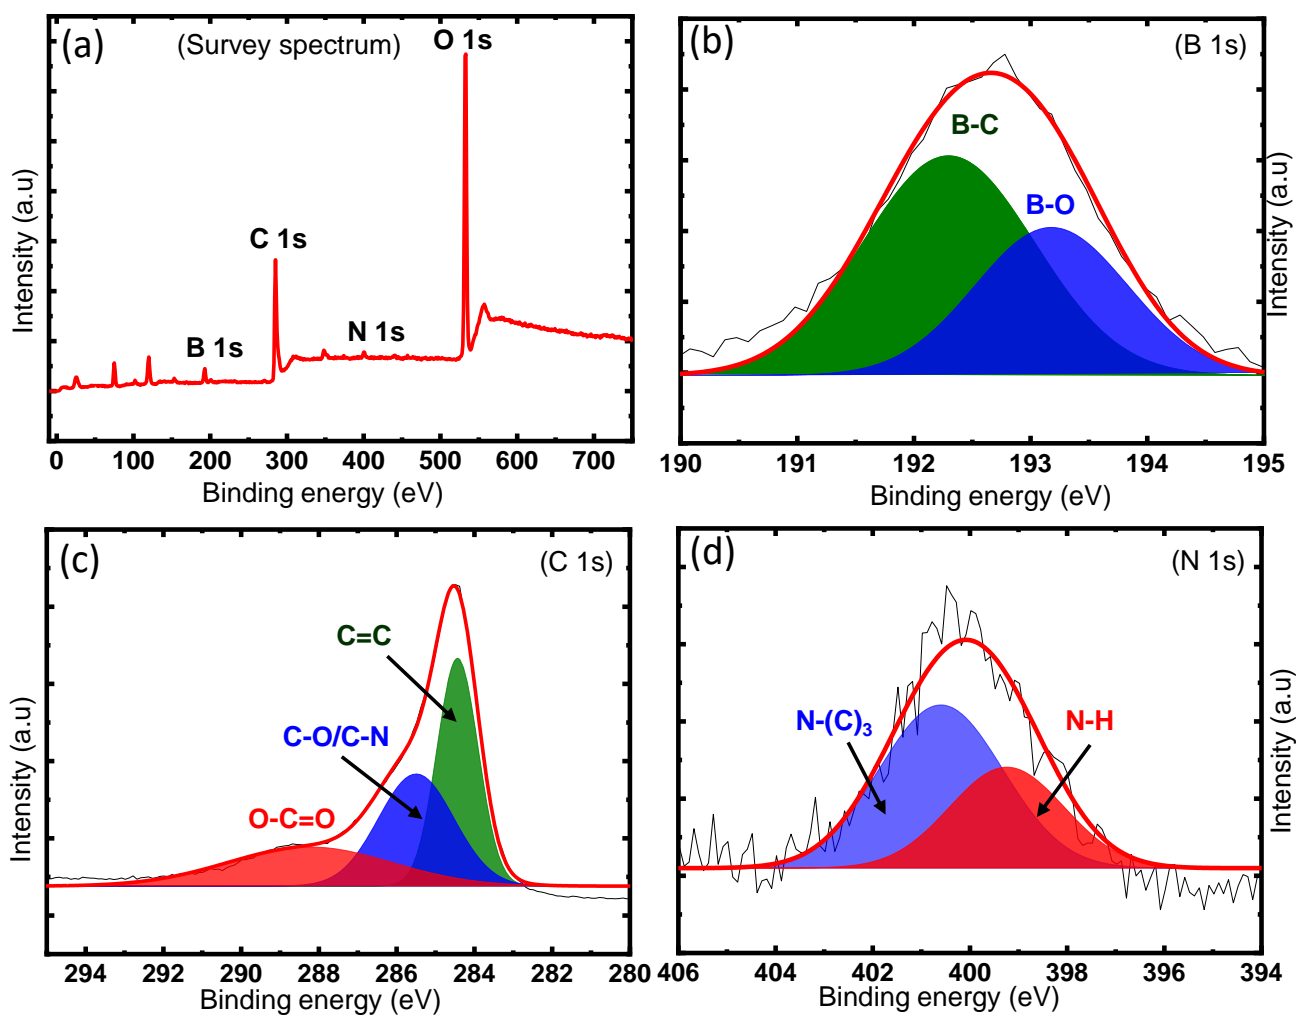

**Fig. S1** (a) XPS survey spectrum and (b-d) Deconvoluted scan-profiles of B 1s, C 1s, and N 1s peaks recorded for the boron-doped carbon derived from the spent disposable papercups.

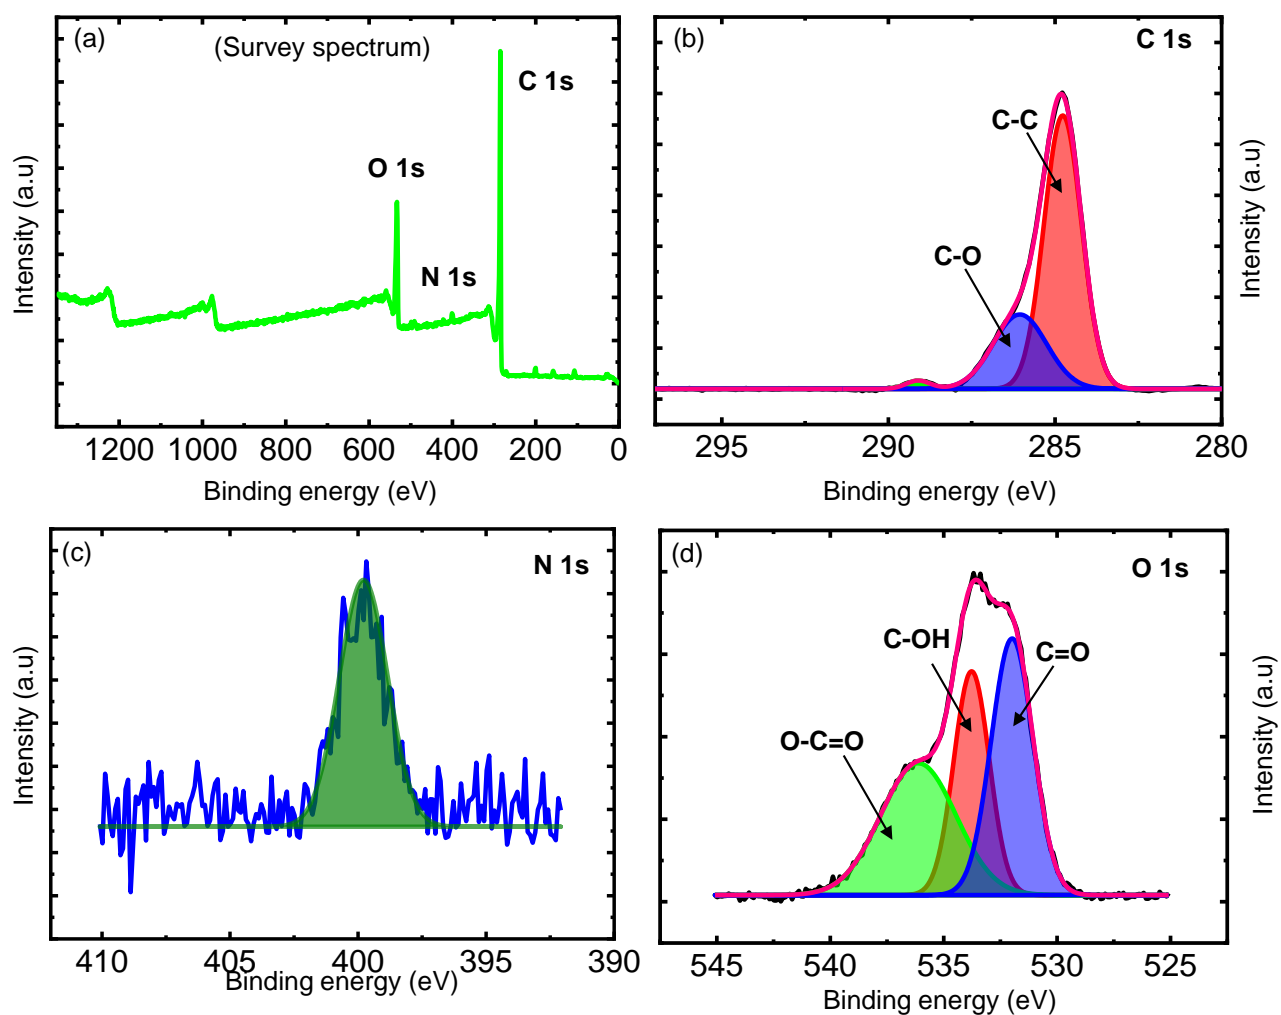

**Fig. S2** (a) XPS survey spectrum and (b-d) Deconvoluted scan-profiles of C 1s, N 1s and O 1s peaks recorded for the nitrogen-doped carbon derived from the spent disposable papercups.

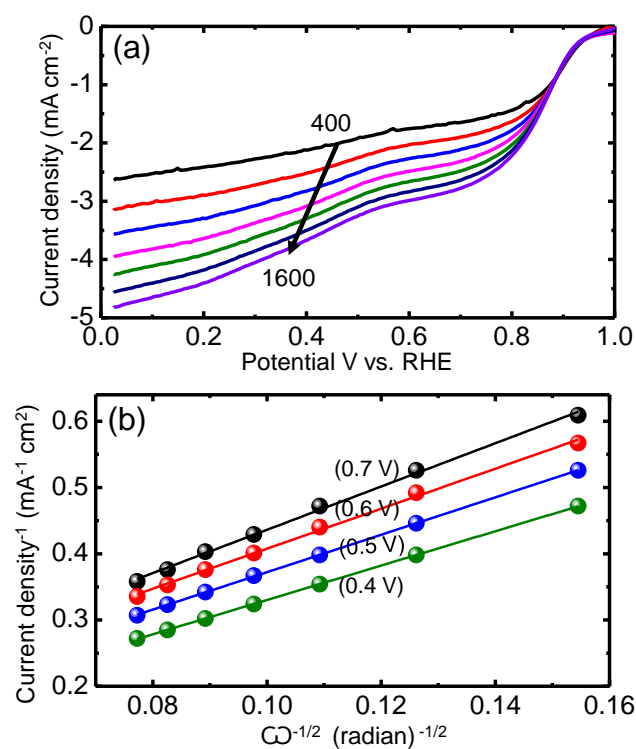

**Fig. S3** (a) Electrode-speed dependent LSV profiles of the boron-doped carbon electrocatalyst at a scan rate of  $10 \text{ mV s}^{-1}$ , (b) K-L plots at different potentials constructed from the LSV plots of the boron-doped carbon electrocatalyst.

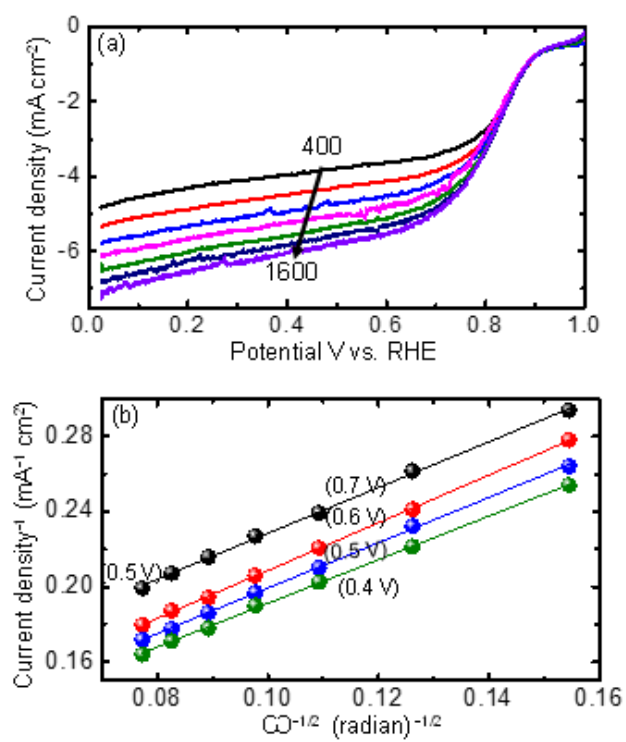

**Fig. S4** (a) Electrode-speed dependent LSV profiles of the nitrogen-doped carbon electrocatalyst at a scan rate of 10 mV s<sup>-1</sup>, (b) K-L plots at different potentials constructed from the LSV plots of the nitrogen-doped carbon electrocatalyst.
